# Supplementary material
Source: PubMed Central journal article supplement (PMC6681563)
Supplement: jamaoncol-5-e191742-s001.pdf [file jamaoncol-5-e191742-s001.pdf]

## Supplementary Online Content

Coghill AE, Suneja G, Rositch AF, Shiels MS, Engels EA. HIV Infection, Cancer Treatment Regimens, and Cancer Outcomes Among Elderly Adults in the United States. *JAMA Oncology*. Published online August 1, 2019. doi:10.1001/jamaoncol.2019.1742

**eTable 1.** Eligible claims codes by cancer site and treatment category

**eTable 2.** Treatment characteristics, by HIV status and cancer site

This supplementary material has been provided by the authors to give readers additional information about their work.

**eTable1. Eligible claims codes by cancer site and treatment category**

| <b>Code</b>              | <b>Type of code</b>  |
|--------------------------|----------------------|
| <b>COLORECTAL CANCER</b> |                      |
| <b>SURGERY</b>           |                      |
| 4835                     | ICD-9 Procedure code |
| 4836                     | ICD-9 Procedure code |
| 44140                    | HCPCS code           |
| 44143                    | HCPCS code           |
| 44145                    | HCPCS code           |
| 44160                    | HCPCS code           |
| 45384                    | HCPCS code           |
| 45385                    | HCPCS code           |
| 4571                     | ICD-9 Procedure code |
| 4572                     | ICD-9 Procedure code |
| 4573                     | ICD-9 Procedure code |
| 4574                     | ICD-9 Procedure code |
| 4575                     | ICD-9 Procedure code |
| 4576                     | ICD-9 Procedure code |
| 4579                     | ICD-9 Procedure code |
| 4580                     | ICD-9 Procedure code |
| 4581                     | ICD-9 Procedure code |
| 4582                     | ICD-9 Procedure code |
| 4583                     | ICD-9 Procedure code |
| 4850                     | ICD-9 Procedure code |
| 4851                     | ICD-9 Procedure code |
| 4852                     | ICD-9 Procedure code |
| 4859                     | ICD-9 Procedure code |
| 4860                     | ICD-9 Procedure code |
| 4861                     | ICD-9 Procedure code |
| 4862                     | ICD-9 Procedure code |
| 4863                     | ICD-9 Procedure code |
| 4864                     | ICD-9 Procedure code |
| 4865                     | ICD-9 Procedure code |
| 4869                     | ICD-9 Procedure code |
| 45110                    | HCPCS code           |
| 45111                    | HCPCS code           |
| 45112                    | HCPCS code           |
| 45113                    | HCPCS code           |
| 45114                    | HCPCS code           |
| 45116                    | HCPCS code           |
| 45119                    | HCPCS code           |
| 45120                    | HCPCS code           |
| 45121                    | HCPCS code           |
| 45123                    | HCPCS code           |
| 45126                    | HCPCS code           |
| 45160                    | HCPCS code           |
| 45171                    | HCPCS code           |
| 45172                    | HCPCS code           |

| <b>Code</b>         | <b>Type of code</b>  |
|---------------------|----------------------|
| 45190               | HCPCS code           |
| <b>RADIOTHERAPY</b> |                      |
| V580                | ICD-9 Diagnosis code |
| 9221                | ICD-9 Procedure code |
| 9222                | ICD-9 Procedure code |
| 9223                | ICD-9 Procedure code |
| 9224                | ICD-9 Procedure code |
| 9225                | ICD-9 Procedure code |
| 9226                | ICD-9 Procedure code |
| 9227                | ICD-9 Procedure code |
| 9228                | ICD-9 Procedure code |
| 9229                | ICD-9 Procedure code |
| 9230                | ICD-9 Procedure code |
| 9231                | ICD-9 Procedure code |
| 9232                | ICD-9 Procedure code |
| 9233                | ICD-9 Procedure code |
| 9239                | ICD-9 Procedure code |
| 9241                | ICD-9 Procedure code |
| 61793               | HCPCS code           |
| 61797               | HCPCS code           |
| 61798               | HCPCS code           |
| 61799               | HCPCS code           |
| 77371               | HCPCS code           |
| 77372               | HCPCS code           |
| 77373               | HCPCS code           |
| 77399               | HCPCS code           |
| 77401               | HCPCS code           |
| 77402               | HCPCS code           |
| 77403               | HCPCS code           |
| 77404               | HCPCS code           |
| 77406               | HCPCS code           |
| 77407               | HCPCS code           |
| 77408               | HCPCS code           |
| 77409               | HCPCS code           |
| 77411               | HCPCS code           |
| 77412               | HCPCS code           |
| 77413               | HCPCS code           |
| 77414               | HCPCS code           |
| 77416               | HCPCS code           |
| 77418               | HCPCS code           |
| 77422               | HCPCS code           |
| 77423               | HCPCS code           |
| 77424               | HCPCS code           |
| 77425               | HCPCS code           |
| 77427               | HCPCS code           |
| 77431               | HCPCS code           |
| 77435               | HCPCS code           |
| 77469               | HCPCS code           |
| 77470               | HCPCS code           |
| 77499               | HCPCS code           |
| 77520               | HCPCS code           |

|                     |                      |
|---------------------|----------------------|
| 77522               | HCPCS code           |
| <b>Code</b>         | <b>Type of code</b>  |
| 77523               | HCPCS code           |
| 77525               | HCPCS code           |
| <b>CHEMOTHERAPY</b> |                      |
| J0640               | HCPCS code           |
| J9999               | HCPCS code           |
| V581                | ICD-9 Diagnosis code |
| 9925                | ICD-9 Procedure code |
| 9928                | ICD-9 Procedure code |
| 96400, 96401        | HCPCS code           |
| 96405               | HCPCS code           |
| 96406               | HCPCS code           |
| 96408, 96409        | HCPCS code           |
| 96411               | HCPCS code           |
| 96410, 96413        | HCPCS code           |
| 96412, 96415        | HCPCS code           |
| 96414, 96416        | HCPCS code           |
| 96417               | HCPCS code           |
| 96420               | HCPCS code           |
| 96422               | HCPCS code           |
| 96423               | HCPCS code           |
| 96425               | HCPCS code           |
| 96440               | HCPCS code           |
| 96445               | HCPCS code           |
| 96446               | HCPCS code           |
| 96450               | HCPCS code           |
| 96542               | HCPCS code           |
| 96545               | HCPCS code           |
| 96549               | HCPCS code           |
| Q0083               | HCPCS code           |
| Q0084               | HCPCS code           |
| Q0085               | HCPCS code           |
| C8953 (96408)       | HCPCS code           |
| C8954 (96410)       | HCPCS code           |
| C8955 (96412)       | HCPCS code           |
| C8957               | HCPCS code           |
| G0355               | HCPCS code           |
| G0357               | HCPCS code           |
| G0358               | HCPCS code           |
| G0359               | HCPCS code           |
| G0360               | HCPCS code           |
| G0361               | HCPCS code           |
| G0362               | HCPCS code           |
| J9035               | HCPCS code           |
| J9050               | HCPCS code           |
| J9055               | HCPCS code           |
| J9178               | HCPCS code           |
| J9190               | HCPCS code           |
| J9201               | HCPCS code           |
| J9206               | HCPCS code           |
| J9263               | HCPCS code           |

|                        |                      |
|------------------------|----------------------|
| J9303                  | HCPCS code           |
| J8520                  | HCPCS code           |
| <b>Code</b>            | <b>Type of code</b>  |
| J8521                  | HCPCS code           |
| J8999                  | HCPCS code           |
| 00004110150            | NDC_CD code          |
| 00004110020            | NDC_CD code          |
| <b>PROSTATE CANCER</b> |                      |
| <b>SURGERY</b>         |                      |
| 6241                   | ICD-9 Procedure code |
| 603                    | ICD-9 Procedure code |
| 604                    | ICD-9 Procedure code |
| 605                    | ICD-9 Procedure code |
| 606                    | ICD-9 Procedure code |
| 609                    | ICD-9 Procedure code |
| 55801                  | HCPCS code           |
| 55810                  | HCPCS code           |
| 55812                  | HCPCS code           |
| 55815                  | HCPCS code           |
| 55821                  | HCPCS code           |
| 55831                  | HCPCS code           |
| 55840                  | HCPCS code           |
| 55842                  | HCPCS code           |
| 55845                  | HCPCS code           |
| 55866                  | HCPCS code           |
| <b>RADIOTHERAPY</b>    |                      |
| 4165F                  | HCPCS code           |
| V580                   | ICD-9 Diagnosis code |
| 9221                   | ICD-9 Procedure code |
| 9222                   | ICD-9 Procedure code |
| 9223                   | ICD-9 Procedure code |
| 9224                   | ICD-9 Procedure code |
| 9225                   | ICD-9 Procedure code |
| 9226                   | ICD-9 Procedure code |
| 9227                   | ICD-9 Procedure code |
| 9228                   | ICD-9 Procedure code |
| 9229                   | ICD-9 Procedure code |
| 9230                   | ICD-9 Procedure code |
| 9231                   | ICD-9 Procedure code |
| 9232                   | ICD-9 Procedure code |
| 9233                   | ICD-9 Procedure code |
| 9239                   | ICD-9 Procedure code |
| 9241                   | ICD-9 Procedure code |
| 77371                  | HCPCS code           |
| 77372                  | HCPCS code           |
| 77373                  | HCPCS code           |
| 77399                  | HCPCS code           |
| 77401                  | HCPCS code           |

|                     |                      |
|---------------------|----------------------|
| 77402               | HCPCS code           |
| 77403               | HCPCS code           |
| 77404               | HCPCS code           |
| <b>Code</b>         | <b>Type of code</b>  |
| 77406               | HCPCS code           |
| 77407               | HCPCS code           |
| 77408               | HCPCS code           |
| 77409               | HCPCS code           |
| 77411               | HCPCS code           |
| 77412               | HCPCS code           |
| 77413               | HCPCS code           |
| 77414               | HCPCS code           |
| 77416               | HCPCS code           |
| 77418               | HCPCS code           |
| 77422               | HCPCS code           |
| 77423               | HCPCS code           |
| 77424               | HCPCS code           |
| 77425               | HCPCS code           |
| 77427               | HCPCS code           |
| 77431               | HCPCS code           |
| 77432               | HCPCS code           |
| 77435               | HCPCS code           |
| 77469               | HCPCS code           |
| 77470               | HCPCS code           |
| 77499               | HCPCS code           |
| 77520               | HCPCS code           |
| 77522               | HCPCS code           |
| 77523               | HCPCS code           |
| 77525               | HCPCS code           |
| 77761               | HCPCS code           |
| 77762               | HCPCS code           |
| 77763               | HCPCS code           |
| 77776               | HCPCS code           |
| 77777               | HCPCS code           |
| 77778               | HCPCS code           |
| 77785               | HCPCS code           |
| 77786               | HCPCS code           |
| 77787               | HCPCS code           |
| 77789               | HCPCS code           |
| 77799               | HCPCS code           |
| <b>CHEMOTHERAPY</b> |                      |
| V581                | ICD-9 Diagnosis code |
| 9925                | ICD-9 Procedure code |
| 9928                | ICD-9 Procedure code |
| 96400, 96401        | HCPCS code           |
| 96405               | HCPCS code           |
| 96406               | HCPCS code           |
| 96408, 96409        | HCPCS code           |
| 96411               | HCPCS code           |
| 96410, 96413        | HCPCS code           |
| 96412, 96415        | HCPCS code           |
| 96414, 96416        | HCPCS code           |

|                        |                      |
|------------------------|----------------------|
| 96417                  | HCPCS code           |
| 96420                  | HCPCS code           |
| 96422                  | HCPCS code           |
| 96423                  | HCPCS code           |
| 96425                  | HCPCS code           |
| <b>Code</b>            | <b>Type of code</b>  |
| 96440                  | HCPCS code           |
| 96445                  | HCPCS code           |
| 96446                  | HCPCS code           |
| 96450                  | HCPCS code           |
| 96542                  | HCPCS code           |
| 96545                  | HCPCS code           |
| 96549                  | HCPCS code           |
| Q0083                  | HCPCS code           |
| Q0084                  | HCPCS code           |
| Q0085                  | HCPCS code           |
| Q2043                  | HCPCS code           |
| C8953 (96408)          | HCPCS code           |
| C8954 (96408)          | HCPCS code           |
| C8955 (96412)          | HCPCS code           |
| C8957                  | HCPCS code           |
| G0355                  | HCPCS code           |
| G0357                  | HCPCS code           |
| G0358                  | HCPCS code           |
| G0359                  | HCPCS code           |
| G0360                  | HCPCS code           |
| G0361                  | HCPCS code           |
| G0362                  | HCPCS code           |
| J9043                  | HCPCS code           |
| J9045                  | HCPCS code           |
| J9060                  | HCPCS code           |
| J9171                  | HCPCS code           |
| J9181                  | HCPCS code           |
| J9293                  | HCPCS code           |
| J9999                  | HCPCS code           |
| J8560                  | HCPCS code           |
| J8999                  | HCPCS code           |
| <b>HORMONE THERAPY</b> |                      |
| 623                    | ICD-9 Procedure code |
| 624                    | ICD-9 Procedure code |
| 6241                   | ICD-9 Procedure code |
| 6242                   | ICD-9 Procedure code |
| 54520                  | HCPCS code           |
| 54521                  | HCPCS code           |
| 54522                  | HCPCS code           |
| 54530                  | HCPCS code           |
| 54535                  | HCPCS code           |
| 54690                  | HCPCS code           |
| J0128                  | HCPCS code           |
| J1050                  | HCPCS code           |
| J1051                  | HCPCS code           |
| J1950                  | HCPCS code           |
| J3315                  | HCPCS code           |

|                     |                      |
|---------------------|----------------------|
| J9202               | HCPCS code           |
| J9217               | HCPCS code           |
| J9218               | HCPCS code           |
| J9219               | HCPCS code           |
| J9155               | HCPCS code           |
| J9165               | HCPCS code           |
| <b>Code</b>         | <b>Type of code</b>  |
| S0165               | HCPCS code           |
| S0175               | HCPCS code           |
| S9560               | HCPCS code           |
| C9216               | HCPCS code           |
| C9430               | HCPCS code           |
| G0356               | HCPCS code           |
| 96400, 96402        | HCPCS code           |
| <b>LUNG CANCER</b>  |                      |
| <b>SURGERY</b>      |                      |
| 32440               | HCPCS code           |
| 32442               | HCPCS code           |
| 32445               | HCPCS code           |
| 32482               | HCPCS code           |
| 32484               | HCPCS code           |
| 32486               | HCPCS code           |
| 32488               | HCPCS code           |
| 32500               | HCPCS code           |
| 32505               | HCPCS code           |
| 32506               | HCPCS code           |
| 32507               | HCPCS code           |
| 32520               | HCPCS code           |
| 32522               | HCPCS code           |
| 32525               | HCPCS code           |
| 32657               | HCPCS code           |
| 32                  | ICD-9 Procedure code |
| 3201                | ICD-9 Procedure code |
| 3209                | ICD-9 Procedure code |
| 321                 | ICD-9 Procedure code |
| 322                 | ICD-9 Procedure code |
| 3220                | ICD-9 Procedure code |
| 3229                | ICD-9 Procedure code |
| 323                 | ICD-9 Procedure code |
| 3230                | ICD-9 Procedure code |
| 3239                | ICD-9 Procedure code |
| 324                 | ICD-9 Procedure code |
| 3241                | ICD-9 Procedure code |
| 3249                | ICD-9 Procedure code |
| 325                 | ICD-9 Procedure code |
| 3250                | ICD-9 Procedure code |
| 3259                | ICD-9 Procedure code |
| 326                 | ICD-9 Procedure code |
| 329                 | ICD-9 Procedure code |
| 32480               | ICD-9 Procedure code |
| <b>RADIOTHERAPY</b> |                      |
| V580                | ICD-9 Diagnosis code |
| 9221                | ICD-9 Procedure code |



|                     |                      |
|---------------------|----------------------|
| 9222                | ICD-9 Procedure code |
| 9223                | ICD-9 Procedure code |
| 9224                | ICD-9 Procedure code |
| 9225                | ICD-9 Procedure code |
| 9226                | ICD-9 Procedure code |
| 9227                | ICD-9 Procedure code |
| 9228                | ICD-9 Procedure code |
| <b>Code</b>         | <b>Type of code</b>  |
| 9229                | ICD-9 Procedure code |
| 9230                | ICD-9 Procedure code |
| 9231                | ICD-9 Procedure code |
| 9232                | ICD-9 Procedure code |
| 9233                | ICD-9 Procedure code |
| 9239                | ICD-9 Procedure code |
| 9241                | ICD-9 Procedure code |
| 77371               | HCPCS code           |
| 77372               | HCPCS code           |
| 77373               | HCPCS code           |
| 77399               | HCPCS code           |
| 77401               | HCPCS code           |
| 77402               | HCPCS code           |
| 77403               | HCPCS code           |
| 77404               | HCPCS code           |
| 77406               | HCPCS code           |
| 77407               | HCPCS code           |
| 77408               | HCPCS code           |
| 77409               | HCPCS code           |
| 77411               | HCPCS code           |
| 77412               | HCPCS code           |
| 77413               | HCPCS code           |
| 77414               | HCPCS code           |
| 77416               | HCPCS code           |
| 77418               | HCPCS code           |
| 77422               | HCPCS code           |
| 77423               | HCPCS code           |
| 77424               | HCPCS code           |
| 77425               | HCPCS code           |
| 77427               | HCPCS code           |
| 77431               | HCPCS code           |
| 77432               | HCPCS code           |
| 77435               | HCPCS code           |
| 77469               | HCPCS code           |
| 77470               | HCPCS code           |
| 77499               | HCPCS code           |
| 77520               | HCPCS code           |
| 77522               | HCPCS code           |
| 77523               | HCPCS code           |
| 77525               | HCPCS code           |
| <b>CHEMOTHERAPY</b> |                      |
| V581                | ICD-9 Diagnosis code |
| 9925                | ICD-9 Procedure code |
| 9928                | ICD-9 Procedure code |
| 96400, 96401        | HCPCS code           |

|               |                     |
|---------------|---------------------|
| 96405         | HCPCS code          |
| 96406         | HCPCS code          |
| 96408, 96409  | HCPCS code          |
| 96411         | HCPCS code          |
| 96410, 96413  | HCPCS code          |
| 96412, 96415  | HCPCS code          |
| 96414, 96416  | HCPCS code          |
| 96417         | HCPCS code          |
| <b>Code</b>   | <b>Type of code</b> |
| 96420         | HCPCS code          |
| 96422         | HCPCS code          |
| 96423         | HCPCS code          |
| 96425         | HCPCS code          |
| 96440         | HCPCS code          |
| 96445         | HCPCS code          |
| 96446         | HCPCS code          |
| 96450         | HCPCS code          |
| 96542         | HCPCS code          |
| 96545         | HCPCS code          |
| 96549         | HCPCS code          |
| Q0083         | HCPCS code          |
| Q0084         | HCPCS code          |
| Q0085         | HCPCS code          |
| C8953 (96408) | HCPCS code          |
| C8954 (96410) | HCPCS code          |
| C8955 (96412) | HCPCS code          |
| C8957         | HCPCS code          |
| C9213         | HCPCS code          |
| C9414         | HCPCS code          |
| C9418         | HCPCS code          |
| C9425         | HCPCS code          |
| C9427         | HCPCS code          |
| C9431         | HCPCS code          |
| C9432         | HCPCS code          |
| G0355         | HCPCS code          |
| G0357         | HCPCS code          |
| G0358         | HCPCS code          |
| G0359         | HCPCS code          |
| G0360         | HCPCS code          |
| G0361         | HCPCS code          |
| G0362         | HCPCS code          |
| J9035         | HCPCS code          |
| J9062         | HCPCS code          |
| J9171         | HCPCS code          |
| J9190         | HCPCS code          |
| J9208         | HCPCS code          |
| J9264         | HCPCS code          |
| J9280         | HCPCS code          |
| J9290         | HCPCS code          |
| J9291         | HCPCS code          |
| J9300         | HCPCS code          |
| J9305         | HCPCS code          |
| J9360         | HCPCS code          |

|                      |                      |
|----------------------|----------------------|
| J7150                | HCPCS code           |
| J8560                | HCPCS code           |
| J8565                | HCPCS code           |
| J8999                | HCPCS code           |
| J9045                | HCPCS code           |
| J9060                | HCPCS code           |
| J9170                | HCPCS code           |
| J9181                | HCPCS code           |
| J9182                | HCPCS code           |
| <b>Code</b>          | <b>Type of code</b>  |
| J9201                | HCPCS code           |
| J9206                | HCPCS code           |
| J9265                | HCPCS code           |
| J9350                | HCPCS code           |
| J9390                | HCPCS code           |
| J9999                | HCPCS code           |
| 00378326694          | NDC_CD code          |
| <b>BREAST CANCER</b> |                      |
| <b>SURGERY</b>       |                      |
| 403                  | ICD-9 Procedure code |
| 4023                 | ICD-9 Procedure code |
| 4051                 | ICD-9 Procedure code |
| 38525                | HCPCS code           |
| 38745                | HCPCS code           |
| 852                  | ICD-9 Procedure code |
| 8520                 | ICD-9 Procedure code |
| 8521                 | ICD-9 Procedure code |
| 8522                 | ICD-9 Procedure code |
| 8523                 | ICD-9 Procedure code |
| 8533                 | ICD-9 Procedure code |
| 8534                 | ICD-9 Procedure code |
| 8535                 | ICD-9 Procedure code |
| 8536                 | ICD-9 Procedure code |
| 854                  | ICD-9 Procedure code |
| 8541                 | ICD-9 Procedure code |
| 8542                 | ICD-9 Procedure code |
| 8543                 | ICD-9 Procedure code |
| 8544                 | ICD-9 Procedure code |
| 8545                 | ICD-9 Procedure code |
| 8546                 | ICD-9 Procedure code |
| 8547                 | ICD-9 Procedure code |
| 8548                 | ICD-9 Procedure code |
| 19120                | HCPCS code           |
| 19125                | HCPCS code           |
| 19126                | HCPCS code           |
| 19160                | HCPCS code           |
| 19162                | HCPCS code           |
| 19180                | HCPCS code           |

|                     |                      |
|---------------------|----------------------|
| 19182               | HCPCS code           |
| 19200               | HCPCS code           |
| 19220               | HCPCS code           |
| 19240               | HCPCS code           |
| 19260               | HCPCS code           |
| 19271               | HCPCS code           |
| 19272               | HCPCS code           |
| 19301               | HCPCS code           |
| 19302               | HCPCS code           |
| <b>Code</b>         | <b>Type of code</b>  |
| 19303               | HCPCS code           |
| 19304               | HCPCS code           |
| 19305               | HCPCS code           |
| 19306               | HCPCS code           |
| 19307               | HCPCS code           |
| <b>RADIOTHERAPY</b> |                      |
| 77781               | HCPCS code           |
| V580                | ICD-9 Diagnosis code |
| 9221                | ICD-9 Procedure code |
| 9222                | ICD-9 Procedure code |
| 9223                | ICD-9 Procedure code |
| 9224                | ICD-9 Procedure code |
| 9225                | ICD-9 Procedure code |
| 9226                | ICD-9 Procedure code |
| 9227                | ICD-9 Procedure code |
| 9228                | ICD-9 Procedure code |
| 9229                | ICD-9 Procedure code |
| 9230                | ICD-9 Procedure code |
| 9231                | ICD-9 Procedure code |
| 9232                | ICD-9 Procedure code |
| 9233                | ICD-9 Procedure code |
| 9239                | ICD-9 Procedure code |
| 9241                | ICD-9 Procedure code |
| 77371               | HCPCS code           |
| 77372               | HCPCS code           |
| 77373               | HCPCS code           |
| 77399               | HCPCS code           |
| 77401               | HCPCS code           |
| 77402               | HCPCS code           |
| 77403               | HCPCS code           |
| 77404               | HCPCS code           |
| 77406               | HCPCS code           |
| 77407               | HCPCS code           |
| 77408               | HCPCS code           |
| 77409               | HCPCS code           |
| 77411               | HCPCS code           |
| 77412               | HCPCS code           |
| 77413               | HCPCS code           |
| 77414               | HCPCS code           |

|                     |                      |
|---------------------|----------------------|
| 77416               | HCPCS code           |
| 77418               | HCPCS code           |
| 77422               | HCPCS code           |
| 77423               | HCPCS code           |
| 77424               | HCPCS code           |
| 77425               | HCPCS code           |
| 77427               | HCPCS code           |
| 77431               | HCPCS code           |
| 77432               | HCPCS code           |
| 77435               | HCPCS code           |
| <b>Code</b>         | <b>Type of code</b>  |
| 77469               | HCPCS code           |
| 77470               | HCPCS code           |
| 77499               | HCPCS code           |
| 77520               | HCPCS code           |
| 77522               | HCPCS code           |
| 77523               | HCPCS code           |
| 77525               | HCPCS code           |
| 77761               | HCPCS code           |
| 77762               | HCPCS code           |
| 77763               | HCPCS code           |
| 77776               | HCPCS code           |
| 77777               | HCPCS code           |
| 77778               | HCPCS code           |
| 77789               | HCPCS code           |
| <b>CHEMOTHERAPY</b> |                      |
| V581                |                      |
| 9925                | ICD-9 Procedure code |
| 9928                | ICD-9 Procedure code |
| 96400, 96401        | HCPCS code           |
| 96405               | HCPCS code           |
| 96406               | HCPCS code           |
| 96408, 96409        | HCPCS code           |
| 96411               | HCPCS code           |
| 96410, 96413        | HCPCS code           |
| 96412, 96415        | HCPCS code           |
| 96414, 96416        | HCPCS code           |
| 96417               | HCPCS code           |
| 96420               | HCPCS code           |
| 96422               | HCPCS code           |
| 96423               | HCPCS code           |
| 96425               | HCPCS code           |
| 96440               | HCPCS code           |
| 96445               | HCPCS code           |
| 96446               | HCPCS code           |
| 96450               | HCPCS code           |
| 96542               | HCPCS code           |
| 96545               | HCPCS code           |
| 96549               | HCPCS code           |
| Q0083               | HCPCS code           |

|               |                     |
|---------------|---------------------|
| Q0084         | HCPCS code          |
| Q0085         | HCPCS code          |
| C8953 (96408) | HCPCS code          |
| C8954 (96410) | HCPCS code          |
| C8955 (96412) | HCPCS code          |
| C8957         | HCPCS code          |
| C1167         | HCPCS code          |
| C9214         | HCPCS code          |
| C9127         | HCPCS code          |
| C9415         | HCPCS code          |
| <b>Code</b>   | <b>Type of code</b> |
| C9420         | HCPCS code          |
| C9421         | HCPCS code          |
| C9431         | HCPCS code          |
| C9432         | HCPCS code          |
| C9440         | HCPCS code          |
| G0355         | HCPCS code          |
| G0357         | HCPCS code          |
| G0358         | HCPCS code          |
| G0359         | HCPCS code          |
| G0360         | HCPCS code          |
| G0361         | HCPCS code          |
| G0362         | HCPCS code          |
| G0357         | HCPCS code          |
| G0358         | HCPCS code          |
| G0359         | HCPCS code          |
| G0360         | HCPCS code          |
| G0361         | HCPCS code          |
| G0362         | HCPCS code          |
| J9000         | HCPCS code          |
| J9001         | HCPCS code          |
| J9035         | HCPCS code          |
| J9045         | HCPCS code          |
| J9070         | HCPCS code          |
| J9080         | HCPCS code          |
| J9090 – J9097 | HCPCS code          |
| J9170         | HCPCS code          |
| J9175         | HCPCS code          |
| J9178         | HCPCS code          |
| J9180         | HCPCS code          |
| J9190         | HCPCS code          |
| J9200         | HCPCS code          |
| J9201         | HCPCS code          |
| J9250         | HCPCS code          |
| J9260         | HCPCS code          |
| J9264         | HCPCS code          |
| J9265         | HCPCS code          |
| J9280         | HCPCS code          |

|             |                     |
|-------------|---------------------|
| J9290       | HCPCS code          |
| J9291       | HCPCS code          |
| J9293       | HCPCS code          |
| J9355       | HCPCS code          |
| J9357       | HCPCS code          |
| J9390       | HCPCS code          |
| J9999       | HCPCS code          |
| J7150       | HCPCS code          |
| J8520       | HCPCS code          |
| J8521       | HCPCS code          |
| J8530       | HCPCS code          |
| <b>Code</b> | <b>Type of code</b> |
| J8610       | HCPCS code          |
| J8700       | HCPCS code          |
| J8999       | HCPCS code          |
| 00004110150 | NDC_CD code         |
| 00004110020 | NDC_CD code         |

**eTable2. Treatment characteristics, by HIV status and cancer site**

| <b>COLORECTAL CANCER</b>                          | <b>HIV-infected; N (%)</b> | <b>HIV-uninfected; N (%)</b> |
|---------------------------------------------------|----------------------------|------------------------------|
| Surgery (required for eligibility) <sup>a</sup>   |                            |                              |
| Yes                                               | 34 (100)                   | 49,623 (100)                 |
| Median (IQR) days to surgery                      | 36 (18-67)                 | 27 (15-45)                   |
| Radiotherapy + surgery                            |                            |                              |
| Yes                                               | -- <sup>b</sup>            | 6,733 (13.6)                 |
| Median (IQR) days to radiation                    | 56 (46-66)                 | 63 (39-106)                  |
| Median (IQR) number of radiotherapy billing codes | 9 (8-9)                    | 9 (7-25)                     |
| Chemotherapy + surgery                            |                            |                              |
| Yes                                               | 17 (50.0)                  | 21,288 (42.9)                |
| Median (IQR) days to chemotherapy                 | 67 (58-79)                 | 69 (52-94)                   |
| Receipt of 5-FU <sup>c</sup>                      | 15 (88.2)                  | 17,710 (83.2)                |
| Median (IQR) number of 5-FU cycles                | 15 (6-24)                  | 14 (6-23)                    |
|                                                   |                            |                              |
| <b>NON-SMALL-CELL LUNG CANCER</b>                 |                            |                              |
| Surgery                                           |                            |                              |
| Yes                                               | 25 (73.5)                  | 17,213 (58.9)                |
| Median (IQR) days to surgery                      | 46 (34-73)                 | 42 (22-69)                   |
| Radiotherapy                                      |                            |                              |
| Yes                                               | 14 (41.2)                  | 13,744 (47.0)                |
| Median (IQR) days to radiation                    | 116 (79-131)               | 68 (42-124)                  |
| Median (IQR) number radiotherapy of billing codes | 10 (7-15)                  | 10 (7-25)                    |
| Chemotherapy                                      |                            |                              |
| Yes                                               | 15 (44.1)                  | 15,673 (50.2)                |
| Median (IQR) days to chemotherapy                 | 77 (62-156)                | 68 (44-109)                  |
| Receipt of platinum                               | 11 (73.3)                  | 12,882 (87.8)                |
| Median (IQR) number of platinum cycles            | 4 (1-6)                    | 5 (3-7)                      |
| Receipt of etoposide and/or docetaxel             | --                         | 10,950 (74.6)                |
|                                                   |                            |                              |
| <b>PROSTATE CANCER</b>                            |                            |                              |
| Surgery                                           |                            |                              |
| Yes                                               | 32 (18.8)                  | 33,060 (24.9)                |
| Median (IQR) days to surgery                      | 79 (60-107)                | 76 (55-107)                  |
| Radiotherapy                                      |                            |                              |
| Yes                                               | 113 (66.5)                 | 78,176 (58.8)                |
| Median (IQR) days to radiation                    | 109 (77-158)               | 103 (68-154)                 |
| Median (IQR) number radiotherapy of billing codes | 11 (7-29)                  | 11 (4-27)                    |
| Hormone therapy                                   |                            |                              |
| Yes                                               | 91 (53.5)                  | 67,773 (51.0)                |
| Median (IQR) days to hormone therapy              | 62 (36-94)                 | 47 (32-73)                   |
|                                                   |                            |                              |
| <b>BREAST CANCER</b>                              |                            |                              |
| Surgery (required for eligibility)                |                            |                              |
| Yes                                               | 50 (100)                   | 96,124 (100)                 |
| Median (IQR) days to surgery                      | 27 (10-46)                 | 32 (19-48)                   |
| Mastectomy                                        | 29 (58.0)                  | 51,542 (53.8)                |
| Excision or lumpectomy <sup>d</sup>               | 21 (42.0)                  | 44,306 (46.2)                |
| Radiotherapy + surgery                            |                            |                              |
| Yes                                               | 27 (54.0)                  | 56,903 (59.2)                |
| Median (IQR) days to radiation                    | 91 (65-197)                | 92 (66-153)                  |
| Median (IQR) number of radiotherapy billing codes | 11 (8-30)                  | 9 (8-28)                     |
| Chemotherapy + surgery                            |                            |                              |
| Yes                                               | 15 (30.0)                  | 22,971 (23.9)                |
| Median (IQR) days to chemotherapy                 | 66 (30-85)                 | 77 (58-102)                  |
| Median (IQR) number of cyclophosphamide cycles    | 4 (2-4)                    | 4 (4-5)                      |
| Receipt of additional chemotherapy <sup>e</sup>   | 12 (80.0)                  | 17,215 (74.9)                |



|                                                                                                                                                                                                                                                                                                                                                                                                                                                                                                                                                                                                                                                                                                                                                                                                                                                             |  |  |
|-------------------------------------------------------------------------------------------------------------------------------------------------------------------------------------------------------------------------------------------------------------------------------------------------------------------------------------------------------------------------------------------------------------------------------------------------------------------------------------------------------------------------------------------------------------------------------------------------------------------------------------------------------------------------------------------------------------------------------------------------------------------------------------------------------------------------------------------------------------|--|--|
|                                                                                                                                                                                                                                                                                                                                                                                                                                                                                                                                                                                                                                                                                                                                                                                                                                                             |  |  |
| <p>Abbreviations: IQR (interquartile range) <sup>a</sup>We included only surgery codes for curative, not diagnostic, procedures. <sup>b</sup>Numbers &lt;11 are not reported in accordance with the SEER-Medicare data use agreement, but HIV-infected and HIV-uninfected patients did not differ substantially regarding the proportion who received radiotherapy and surgery. <sup>c</sup>Percentages for receipt of specific drugs are calculated among those receiving chemotherapy. <sup>d</sup>The surgery variable was classified in the following hierarchical order: mastectomy, lumpectomy, and excision-only. For example, a woman with an excision code and mastectomy code is categorized as receiving a mastectomy. <sup>e</sup>Additional chemotherapy is defined as receipt of adriamycin, docetaxel/paclitaxel, methotrexate, or 5-FU.</p> |  |  |
